# Supplementary material
Source: PubMed Central journal article supplement (PMC9691261)
Supplement: NIHMS1834120-supplement-mmc8.pdf [file NIHMS1834120-supplement-mmc8.pdf]

**Data S1: Composition and function of hCom1 and hCom2, related to Figure 1.**

**Table of Contents**

|               |                                                                                            |
|---------------|--------------------------------------------------------------------------------------------|
| <b>Page 2</b> | Comparison of hCom1 phylogeny and composition versus typical Western human gut communities |
| <b>Page 4</b> | Taxonomy and functional composition of hCom1 and hCom2                                     |

**A**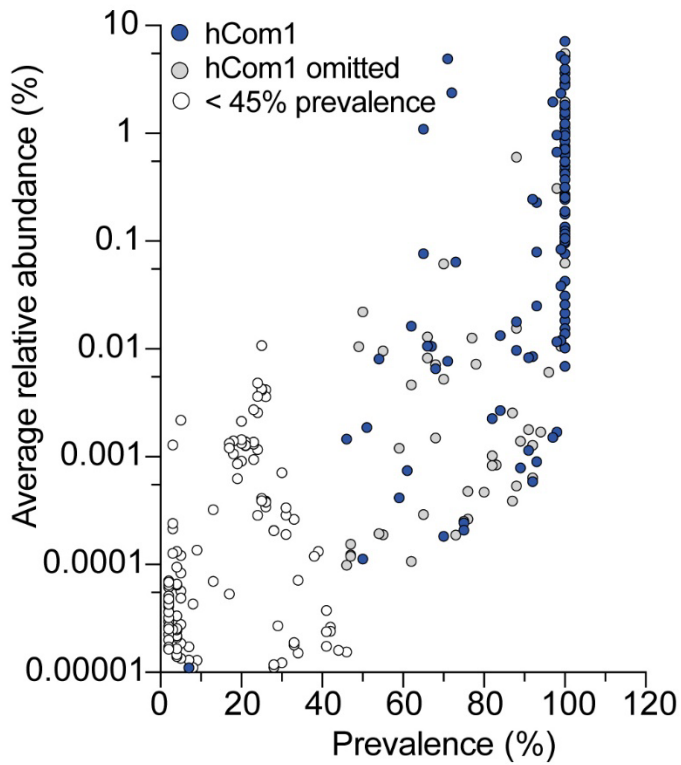**B**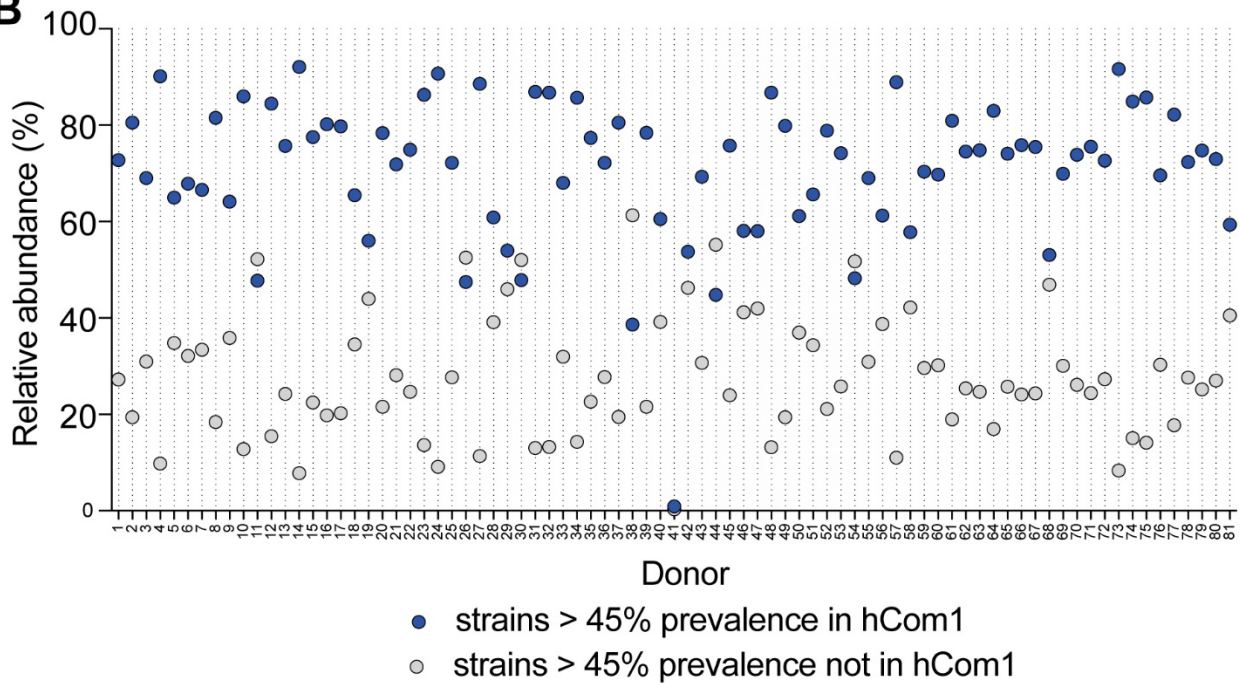

The 104-member community hCom1 is phylogenetically and compositionally reflective of typical Western human gut communities. (A) Prevalence versus average relative abundance

of all 522 gut bacterial strains found among the 81 healthy HMP donors. Strains that were present in >45% of donors and included in hCom1 are colored blue and those omitted from hCom1 are colored gray. Strains not considered for inclusion in hCom1 are colored white. **(B)** Donor-specific relative abundance profiles of strains at >45% prevalence across HMP donors. Blue dots represent summed relative abundances of strains included in hCom1 and gray dots represent summed relative abundances of strains omitted from hCom1.

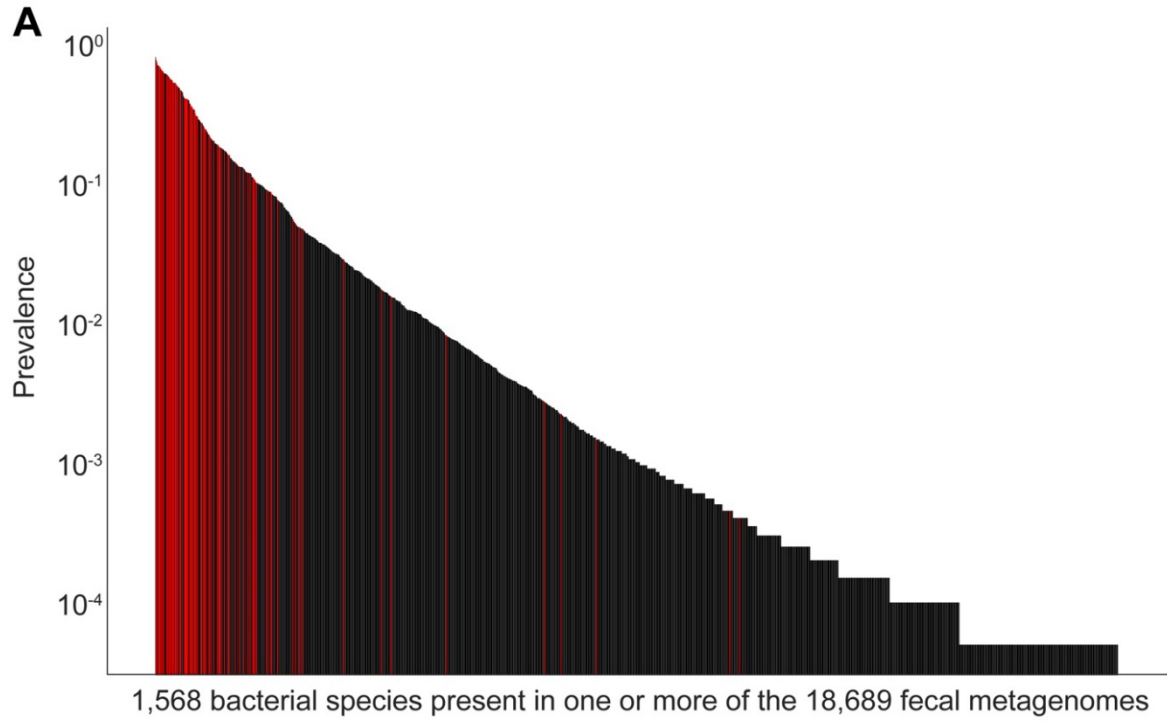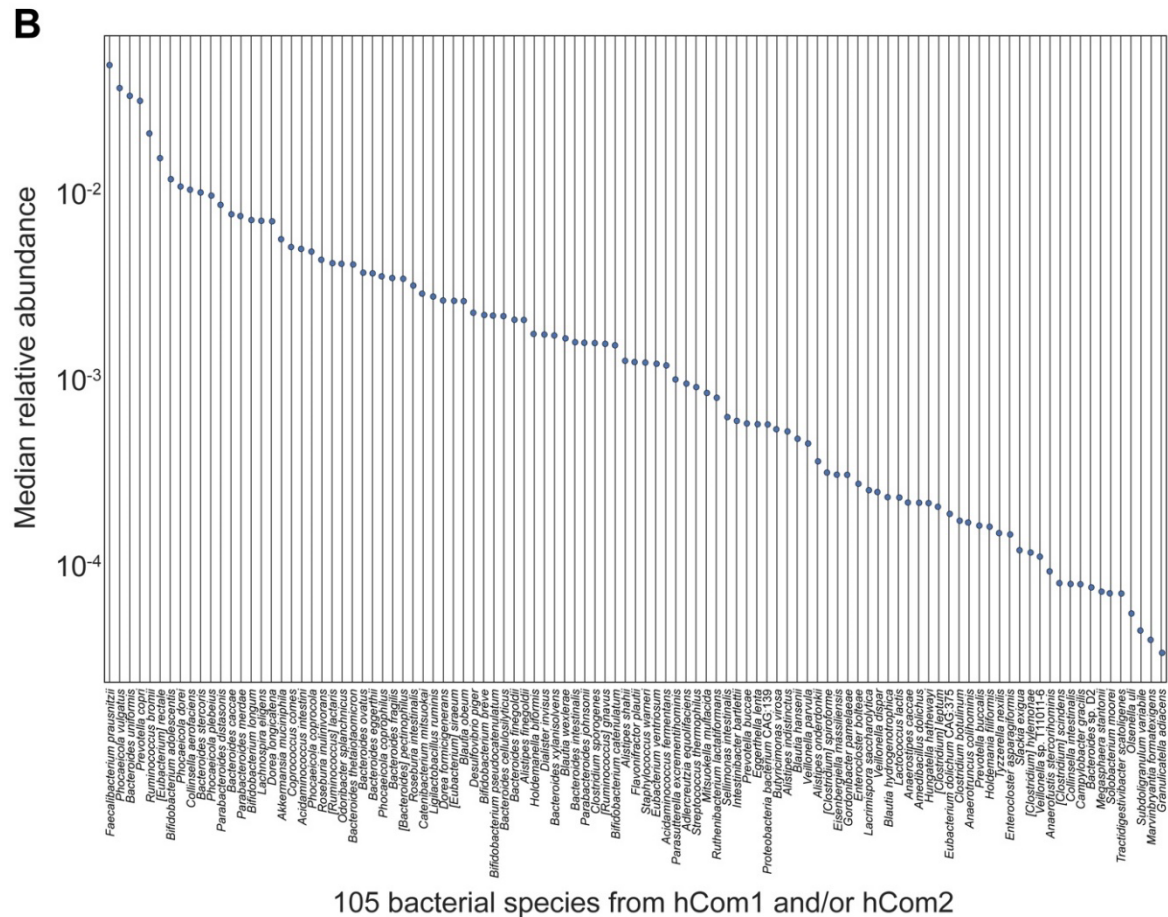

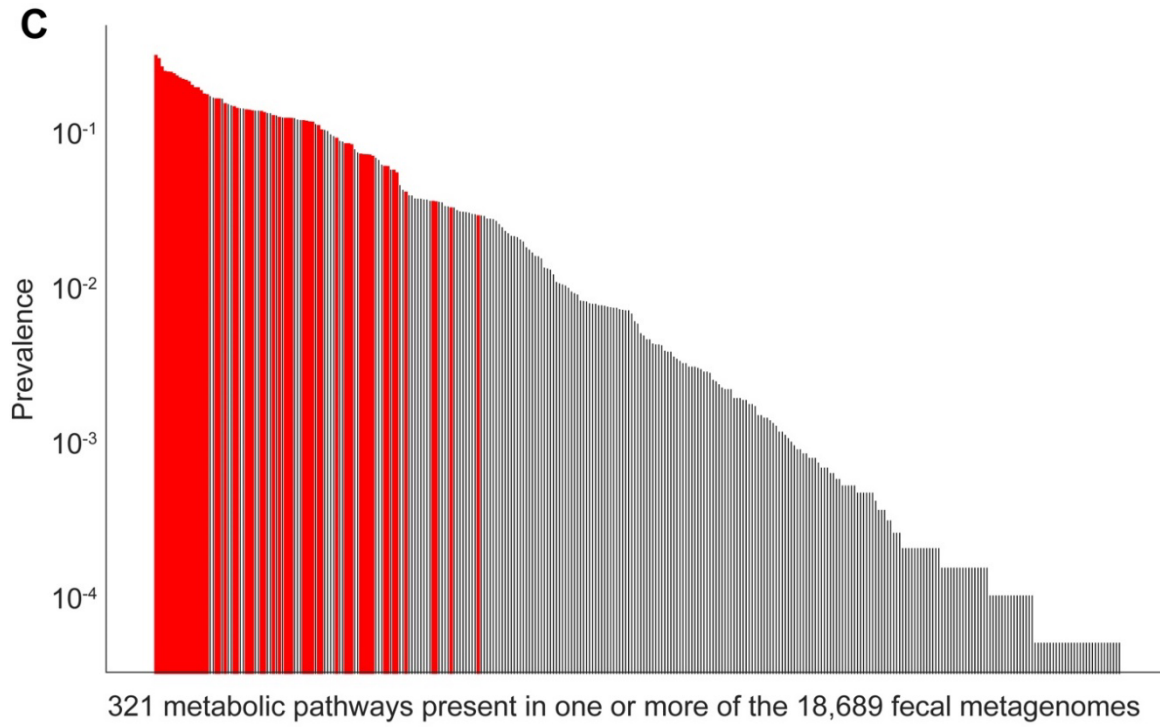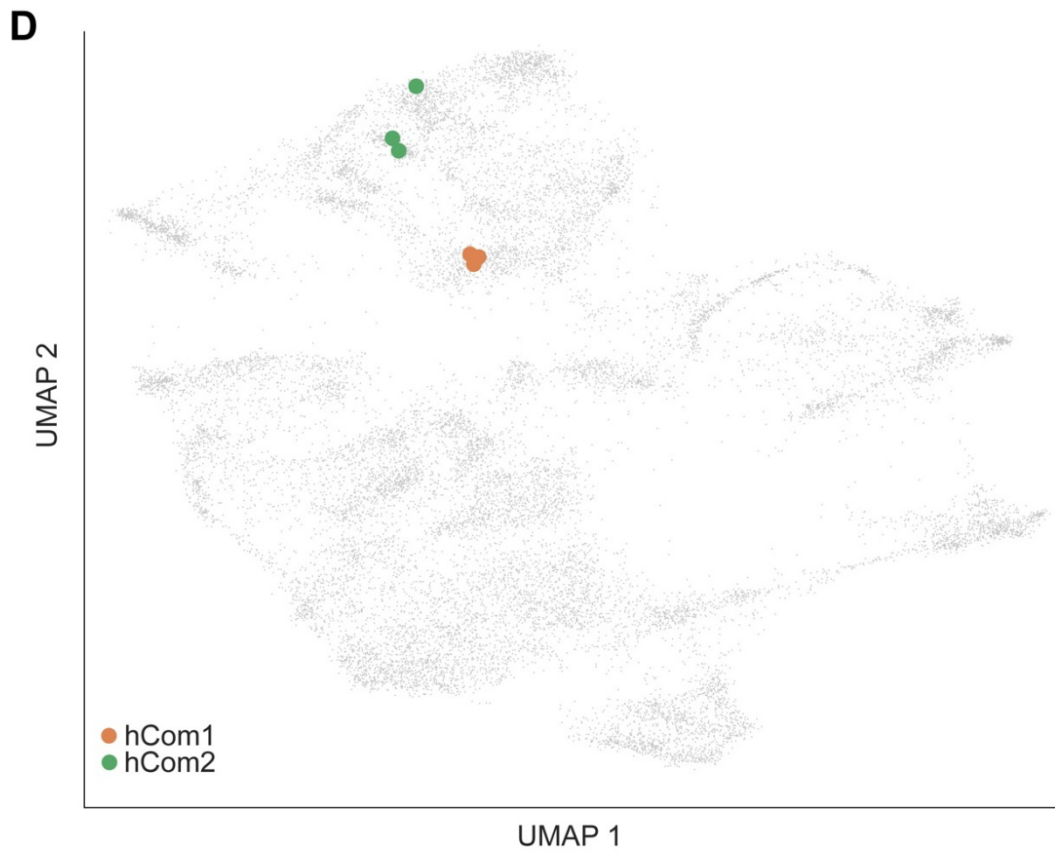

**hCom1 and hCom2 are taxonomically and functionally representative of human gut microbiomes.** (A) Comparison of hCom1 and hCom2 taxonomy and functionality with fecal metagenomes. Prevalence of the 105 species detected by MetaPhlAn3 in hCom1 and/or hCom2 (red) and the 1,463 species not present in hCom1 or hCom2 (black) in a diverse set of human gut metagenomes. 34/105 species were present in >7,489 (40%) of the samples, and 81/105 species were present in >1,000 samples. (B) Relative abundance of hCom1 and hCom2 species in a diverse set of human gut microbiomes. Median relative abundance of all species from hCom1 and hCom2 is shown. Species from hCom1 and hCom2 account for 66% of the aggregate relative abundance on average. (C,D) Comparison of the metabolic pathway profile of hCom1, hCom2, and 18,689 gut metagenomes based on the Humann3 pathways list. A pathway was considered to be present if coverage at the community level was >50%. 321 pathways were detected in the 18,689 gut metagenomes. The median gut metagenome contained 59/321 pathways; the hCom1 and hCom2 metagenomes contained an average of 51/321 pathways (red bars).
