# Supplementary material
Source: PubMed Central journal article supplement (PMC9691261)
Supplement: NIHMS1834120-supplement-mmc10.pdf [file NIHMS1834120-supplement-mmc10.pdf]

**Data S3: Discovery and elucidation of a strain-amino acid interaction and its molecular mechanism, related to Figure 2.**

**Table of Contents**

|               |                                                                                                                                                                                                |
|---------------|------------------------------------------------------------------------------------------------------------------------------------------------------------------------------------------------|
| <b>Page 2</b> | <i>C. sporogenes</i> , <i>L. lactis</i> , and <i>L. ruminis</i> are highly sensitive to amino acid perturbation                                                                                |
| <b>Page 4</b> | The relative abundance of <i>C. sporogenes</i> was not affected significantly by the removal of phenylalanine, tyrosine, or tryptophan                                                         |
| <b>Page 5</b> | Deletion of ornithine transcarbamoylase ( <i>otc</i> ), but not arginine deiminase ( <i>adi</i> ), impairs arginine-dependent <i>C. sporogenes</i> growth in minimal medium and ATP production |

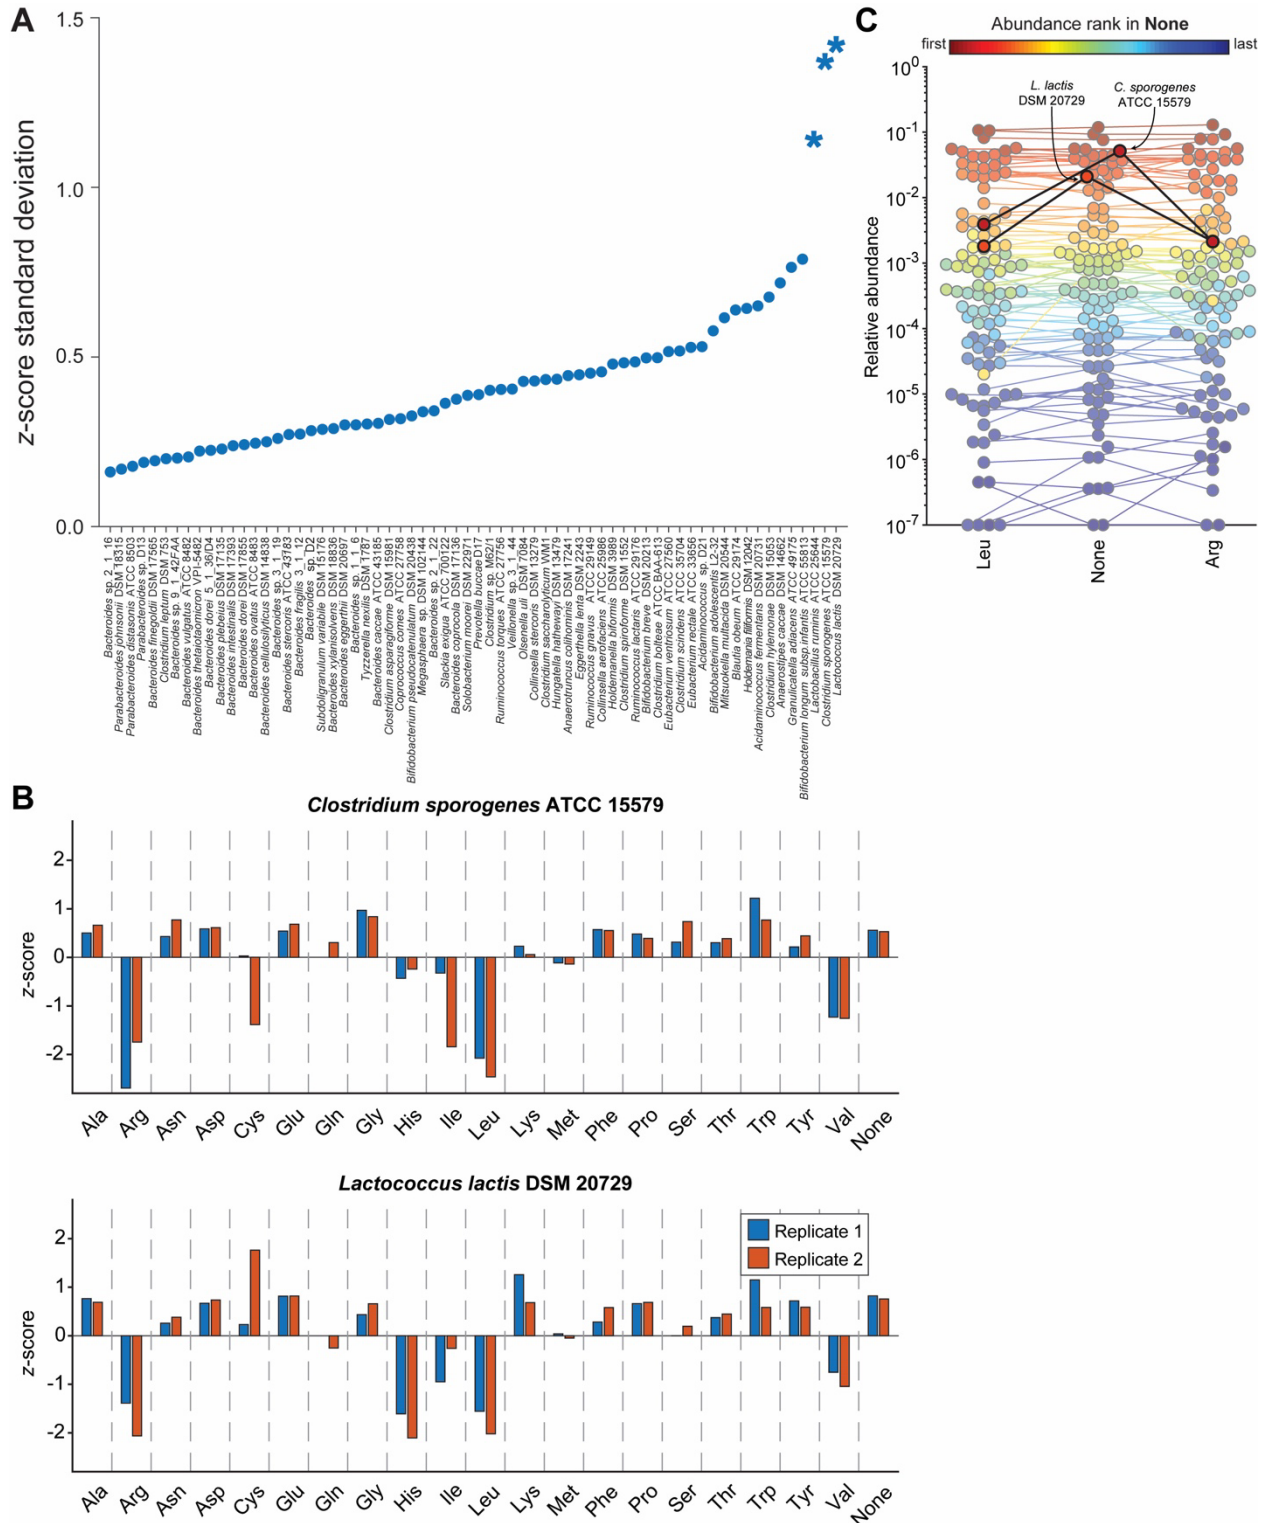

**C. sporogenes, L. lactis, and L. ruminis are highly sensitive to amino acid perturbation. (A)** The standard deviation of the z-scores of *C. sporogenes*, *L. lactis*, and *L. ruminis* (asterisks) was substantially higher than of all other strains. **(B)** The effect of amino acid removal on *C.*

*sporogenes* and *L. lactis* is reproducible. A z-score was calculated for two independent replicates based on the standard deviation of strain abundance across all samples. (C) The absence of leucine or arginine leads to a large decrease in the relative abundance of *C. sporogenes* and *L. lactis*. Strains are colored according to their rank-order abundance in the community grown in complete defined medium.

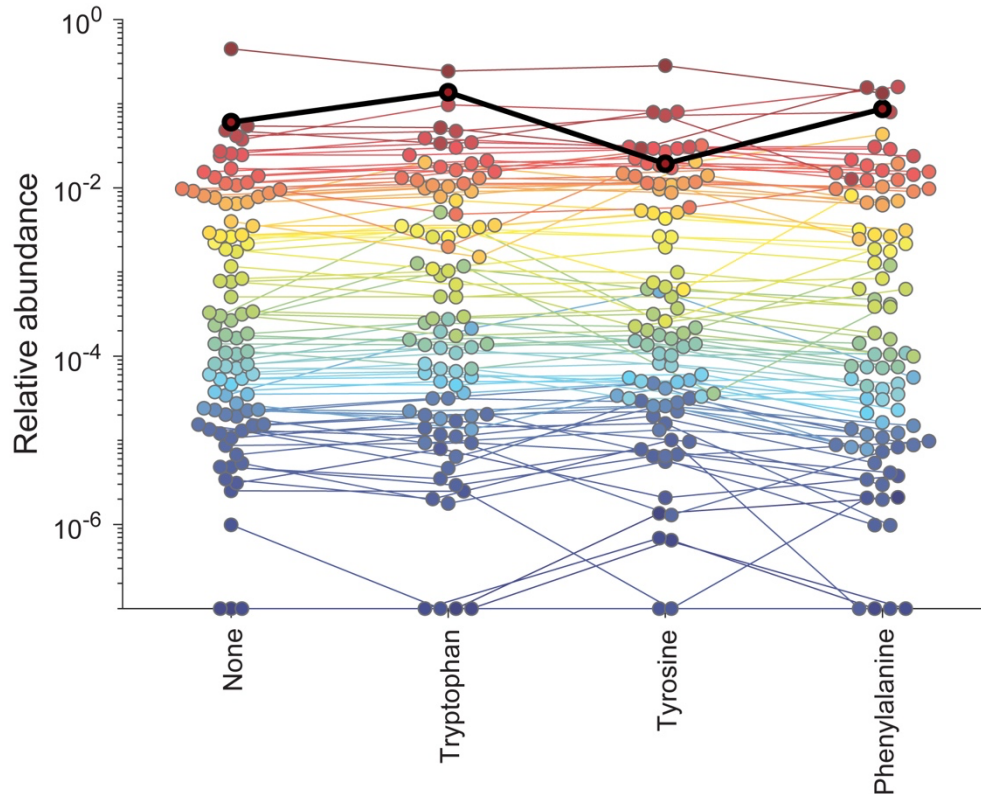

**The relative abundance of *C. sporogenes* was not affected significantly by the removal of phenylalanine, tyrosine, or tryptophan.** Each circle is an individual strain, and the collection of circles in a column represents the community at 48 h. Strains are colored according to their rank-order abundance in the community grown in complete defined medium. Undetected strains were set to  $10^{-7}$  for visualization. The thick black line shows the relative abundance of *C. sporogenes*.

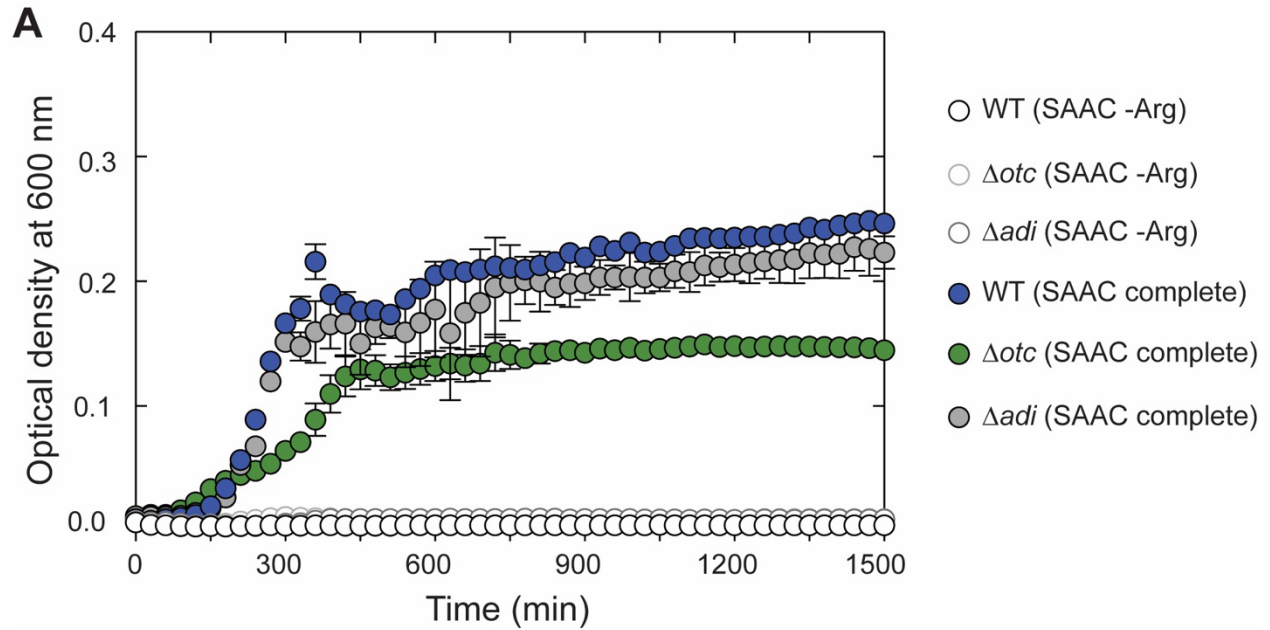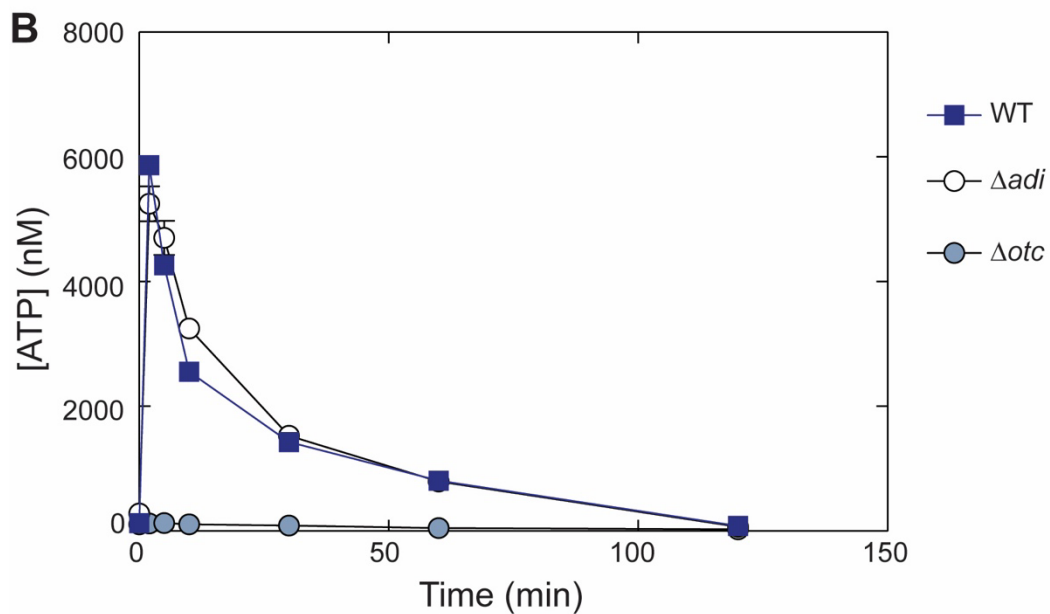

**Deletion of ornithine transcarbamoylase (*otc*), but not arginine deiminase (*adi*), impairs arginine-dependent *C. sporogenes* growth in minimal medium and ATP production. (A) Intracellular ATP levels in wild-type *C. sporogenes* and  $\Delta adi$  and  $\Delta otc$  mutants incubated in PBS containing 2 mM arginine. Wild-type *C. sporogenes* and  $\Delta adi$  generated ATP in SAAC, whereas  $\Delta otc$  did not. (B) Wild-type *C. sporogenes* and  $\Delta adi$  and  $\Delta otc$  mutants were grown in complete defined medium (SAAC) +/- arginine. Growth curves depict the mean of 3 replicates. Error bars represent 1 standard deviation. *C. sporogenes* was unable to grow in SAAC without arginine**

(white circles). The growth of wild-type *C. sporogenes* (blue) in SAAC was similar to that of an  $\Delta adi$  mutant (gray), but growth was substantially impaired by deletion of *otc* (green).
