# Supplementary material
Source: PubMed Central journal article supplement (PMC9691261)
Supplement: NIHMS1834120-supplement-mmc12.pdf [file NIHMS1834120-supplement-mmc12.pdf]

## Data S5. hCom2 as a model system, related to Figure 6.

### Table of Contents

- Page 2.** The architecture of hCom2 is highly reproducible across technical replicates and similar between two strains of mice
- Page 3.** Immune cell types and numbers were broadly similar between hCom2-colonized and humanized mice and distinct from germ-free mice

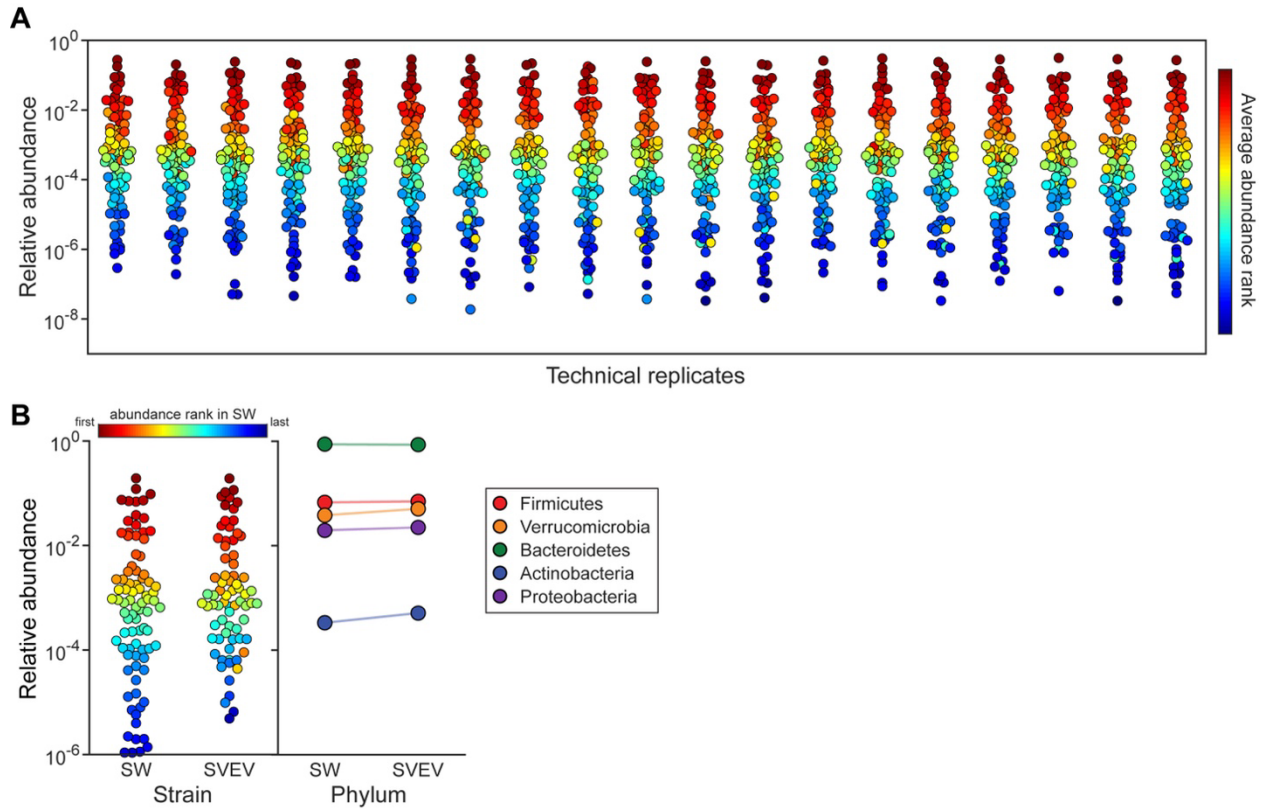

**The architecture of hCom2 is highly reproducible across technical replicates and similar between two strains of mice.** (A) Metagenomic sequencing of fecal samples from the second fecal challenge experiment prior to fecal challenge (week 4) reveals a high degree of technical reproducibility. As assessed by NinjaMap, strain relative abundances in the 20 mice colonized by the same hCom2 inoculum were highly similar (pairwise Pearson's correlation coefficients >0.93). (B) Two genetically distinct strains of mice, Swiss webster (SW) and SVEV, were colonized with hCom2 and housed for 4 weeks. Fecal community profiles are shown at the strain and phylum levels. The Pearson correlation coefficient between SW and SVEV mice was >0.95.

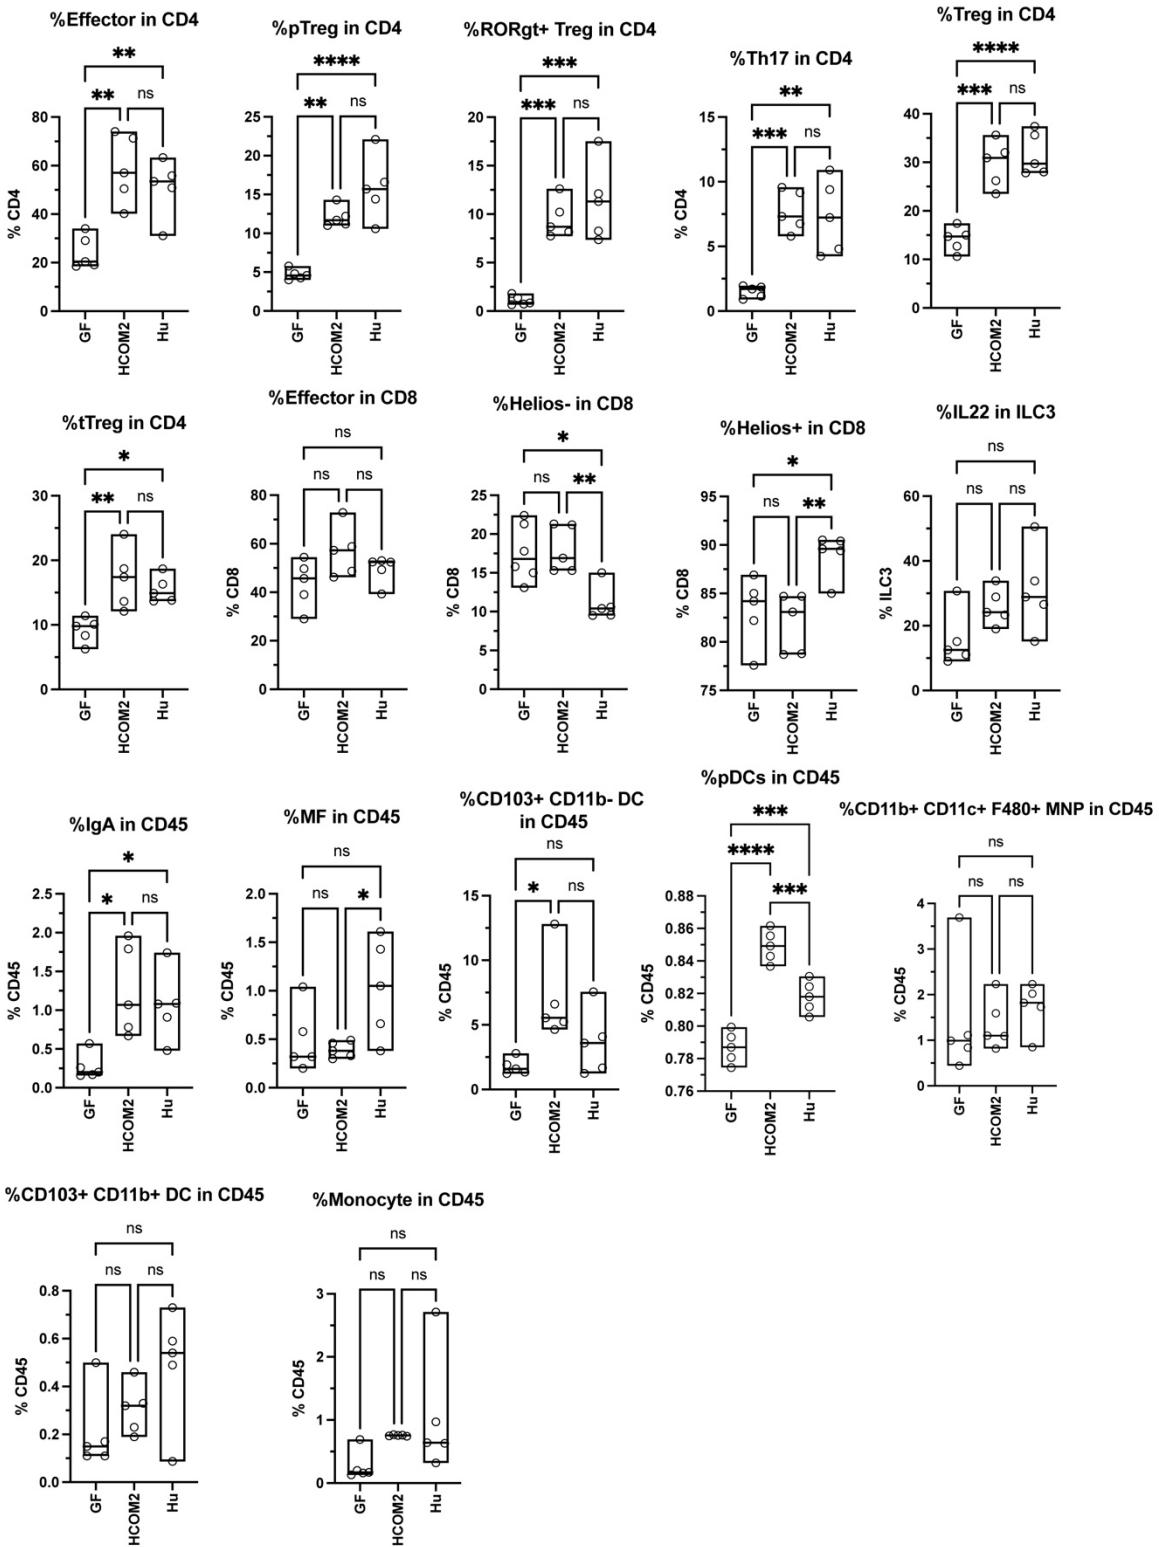

Immune cell types and numbers were broadly similar between hCom2-colonized and humanized mice and distinct from germ-free mice. Colonic immune cells were extracted from hCom2-colonized, humanized, or germ-free mice (all C57BL/6), stained for cell surface markers,

and assessed by flow cytometry. Statistical significance was assessed using a Student's two tailed t-test.
